# Supplementary material
Source: ML conference proceedings conference paper supplement (https://proceedings.neurips.cc/paper_files/paper/2019/hash/ad3019b856147c17e82a5bead782d2a8-Abstract.html)
Supplement: Supplementary file [file ad3019b856147c17e82a5bead782d2a8-Supplemental.zip]

---

# Nearly Linear-Time, Deterministic Algorithm for Maximizing (Non-Monotone) Submodular Functions Under Cardinality Constraint

---

Anonymous Author(s)

Affiliation

Address

email

## Abstract

1 We develop two deterministic approximation algorithms for the maximization of  
2 non-monotone submodular functions under cardinality constraint: both are based  
3 upon the novel idea of interlacing two greedy procedures. Our algorithm FastInter-  
4 laceGreedy uses interlaced, thresholded greedy procedures to obtain ratio  $1/4 - \varepsilon$   
5 in  $O\left(\frac{n}{\varepsilon} \log\left(\frac{n}{\varepsilon}\right)\right)$  queries of the objective, which improves upon both the ratio and  
6 the quadratic time complexity of the previously fastest deterministic algorithm for  
7 this problem. We validate our algorithms in the context of two applications of non-  
8 monotone submodular maximization, on which FastInterlaceGreedy outperforms  
9 the fastest deterministic and randomized algorithms in prior literature.

## 10 1 Introduction

11 Because of sundry applications, the maximization of a nonnegative submodular<sup>1</sup> function with respect  
12 to a cardinality constraint (MCC) has a long history of study (Nemhauser et al., 1978). Applications of  
13 MCC include viral marketing (Kempe et al., 2003), network monitoring (Leskovec et al., 2007), video  
14 summarization (Mirzasoleiman et al., 2018), and MAP Inference for Determinantal Point Processes  
15 (Gillenwater et al., 2012), among many others. In recent times, the amount of data generated by many  
16 applications has been increasing exponentially; therefore, linear or sublinear-time algorithms are  
17 needed.

18 When  $f$  is monotone, greedy approaches for MCC have proven effective and nearly optimal, both in  
19 terms of query complexity and approximation factor: subject to a cardinality constraint  $k$ , a simple  
20 greedy algorithm gives a  $(1 - 1/e)$  approximation ratio in  $O(kn)$  queries (Nemhauser et al., 1978),  
21 where  $n$  is the size of the instance. Furthermore, this ratio is optimal under the value oracle model  
22 (Nemhauser and Wolsey, 1978). Badanidiyuru and Vondrák (2014) sped up the greedy algorithm  
23 to require  $O(n \log n)$  queries while sacrificing only a small  $\varepsilon > 0$  in the approximation ratio, while  
24 Mirzasoleiman et al. (2015) developed a randomized  $(1 - 1/e - \varepsilon)$  approximation in  $O(n/\varepsilon)$  queries.

25 When  $f$  is non-monotone, the situation is very different; no subquadratic deterministic algorithm has  
26 yet been developed. Although a linear-time, randomized  $(1/e - \varepsilon)$ -approximation has been developed  
27 by Buchbinder et al. (2015), which requires  $O\left(\frac{n}{\varepsilon^2} \log \frac{1}{\varepsilon}\right)$  queries, the performance guarantee of this  
28 algorithm holds only in expectation. A derandomized version of the algorithm with ratio  $1/e$  has been  
29 developed by Buchbinder and Feldman (2018a) but has time complexity  $O(k^3n)$ . Therefore, in this  
30 work, an emphasis is placed upon the development of nearly linear-time, deterministic approximation  
31 algorithms.

---

<sup>1</sup>For technical definitions of terms used in the Introduction, the reader is referred to Section 1.

Table 1: Fastest algorithms for cardinality constraint

| Algorithm                    | Ratio               | Time complexity                                                    | Deterministic? |
|------------------------------|---------------------|--------------------------------------------------------------------|----------------|
| FastInterlaceGreedy (Alg. 2) | $1/4 - \varepsilon$ | $O\left(\frac{n}{\varepsilon} \log \frac{n}{\varepsilon}\right)$   | Yes            |
| Gupta et al. (2010)          | $1/6 - \varepsilon$ | $O\left(nk + \frac{n}{\varepsilon}\right)$                         | Yes            |
| Buchbinder et al. (2015)     | $1/e - \varepsilon$ | $O\left(\frac{n}{\varepsilon^2} \log \frac{1}{\varepsilon}\right)$ | No             |

## 32 Contributions

33 We provide the deterministic approximation algorithm InterlaceGreedy (Alg. 1) for maximization of  
 34 a submodular function subject to a cardinality constraint (MCC). InterlaceGreedy achieves ratio  $1/4$   
 35 in  $O(kn)$  queries to the objective function. We then speed the algorithm up in FastInterlaceGreedy  
 36 (Alg. 2) to achieve ratio  $(1/4 - \varepsilon)$  in  $O\left(\frac{n}{\varepsilon} \log \frac{n}{\varepsilon}\right)$  queries. In Table 1, we show the relationship to  
 37 the fastest deterministic and randomized algorithms for MCC in prior literature.

38 Both algorithms operate by interlacing two greedy procedures together in a novel manner; that is,  
 39 the two greedy procedures alternately select elements into disjoint sets and are disallowed from  
 40 selection of the same element. We demonstrate this technique first with the interlacing of two standard  
 41 greedy procedures in InterlaceGreedy, before interlacing thresholded greedy procedures developed  
 42 by Badanidiyuru and Vondrák (2014) for monotone submodular functions to obtain the algorithm  
 43 FastInterlaceGreedy.

44 Our algorithms are validated in the context of cardinality-constrained maximum cut and social  
 45 network monitoring, which are both instances of MCC. In this evaluation, FastInterlaceGreedy  
 46 is more than an order of magnitude faster than the fastest deterministic algorithm (Gupta et al.,  
 47 2010) and is both faster and obtains better solution quality than the fastest randomized algorithm  
 48 (Buchbinder et al., 2015). The anonymized source code to reproduce the evaluation is available at  
 49 <https://gofile.io/?c=ChYSOQ>.

50 **Organization** The rest of this paper is organized as follows. Related work and preliminaries on  
 51 submodular optimization are discussed in the rest of this section. In Section 2, InterlaceGreedy and  
 52 FastInterlaceGreedy are presented and analyzed. Experimental validation is provided in Section 3.

## 53 Related Work

54 The literature on submodular optimization comprises many works. In this section, a short review of  
 55 relevant techniques is given for MCC; that is, maximization of non-monotone, submodular functions  
 56 over a ground set of size  $n$  with cardinality constraint  $k$ . For further information on other types of  
 57 submodular optimization, interested readers are directed to the survey of Buchbinder and Feldman  
 58 (2018b) and references therein.

59 A deterministic local search algorithm was developed by Lee et al. (2010), which achieves ratio  
 60  $1/4 - \varepsilon$  in  $O(n^4 \log n)$  queries. This algorithm runs two approximate local search procedures in  
 61 succession. By contrast, our algorithm FastInterlaceGreedy employs interlacing of greedy procedures  
 62 to obtain the same ratio in  $O\left(\frac{n}{\varepsilon} \log \frac{n}{\varepsilon}\right)$  queries.

63 Gupta et al. (2010) developed a deterministic, iterated greedy approach, wherein two greedy pro-  
 64 cedures are run in succession and an algorithm for unconstrained submodular maximization are  
 65 employed. This approach requires  $O(nk)$  queries and has ratio  $1/(4 + \alpha)$ , where  $\alpha$  is the inverse  
 66 ratio of the employed subroutine for unconstrained, non-monotone submodular maximization; under  
 67 the value query model, the smallest possible value for  $\alpha$  is 2, as shown by Feige et al. (2011), so  
 68 this ratio is at most  $1/6$ . The iterated greedy approach of Gupta et al. (2010) first runs one standard  
 69 greedy algorithm to completion, then starts a second standard greedy procedure; this differs from  
 70 our interlacing procedure which runs two greedy procedures concurrently and alternates between  
 71 the selection of elements. The algorithm of Gupta et al. (2010) is experimentally compared to  
 72 FastInterlaceGreedy in Section 3. The iterated greedy approach of Gupta et al. (2010) was extended  
 73 and analyzed under more general constraints by a series of works: Mirzasoleiman et al. (2016);  
 74 Feldman et al. (2017); Mirzasoleiman et al. (2018).

75 An elegant randomized greedy algorithm of Buchbinder et al. (2014) achieves expected ratio  $1/e$   
 76 in  $O(kn)$  queries for MCC; this algorithm was derandomized by Buchbinder and Feldman (2018a),

77 but the derandomized version requires  $O(k^3 n)$  queries. The randomized version was sped up  
78 in Buchbinder et al. (2015) to achieve expected ratio  $1/e - \varepsilon$  and require  $O(\frac{n}{\varepsilon^2} \log \frac{1}{\varepsilon})$  queries.  
79 Although this algorithm has better time complexity than FastInterlaceGreedy, the ratio of  $1/e - \varepsilon$   
80 holds only in expectation, which is much weaker than a deterministic approximation ratio. We  
81 compare experimentally with the algorithm of Buchbinder et al. (2015) in Section 3.

82 Recently, an improvement in the adaptive complexity of MCC was made by Balkanski et al. (2018).  
83 Their algorithm, BLITS, requires  $O(\log^2 n)$  adaptive rounds of queries to the objective, where  
84 the queries within each round are independent of one another and thus can be parallelized easily.  
85 Previously the best adaptivity was the trivial  $O(n)$ . However, each round requires  $\Omega(OPT^2)$  samples  
86 to approximate expectations, which for the applications we evaluated in Section 3 is  $\Omega(n^4)$ . For this  
87 reason, BLITS is evaluated as a heuristic in comparison with our algorithms in Section 3.

88 Currently, the best approximation ratio of any algorithm for MCC is 0.385 of Buchbinder and  
89 Feldman (2016). Their algorithm also works under a more general constraint than cardinality  
90 constraint; namely, a matroid constraint. This algorithm is the latest in a series of works (e.g. (Naor  
91 and Schwartz, 2011; Ene and Nguyen, 2016)) using the multilinear extension of a submodular  
92 function, which is expensive to evaluate.

## 93 Preliminaries

94 Given  $n \in \mathbb{N}$ , the notation  $[n]$  is used for the set  $\{0, 1, \dots, n-1\}$ . In this work, functions  $f$  with  
95 domain all subsets of a finite set are considered; hence, without loss of generality, the domain of the  
96 function  $f$  is taken to be  $2^{[n]}$ , which is all subsets of  $[n]$ . A nonnegative function  $f : 2^{[n]} \rightarrow \mathbb{R}^+$  is  
97 *submodular* iff for all  $A, B \subseteq [n]$ ,  $x \in [n] \setminus B$ , such that  $A \subseteq B$ , it holds that  $f(B \cup x) - f(B) \leq$   
98  $f(A \cup x) - f(A)$ .

99 In this work, the problem studied is to maximize a submodular function under a cardinality constraint  
100 (MCC), which is formally defined as follows. Let  $f : 2^n \rightarrow \mathbb{R}^+$  be submodular; let  $k \in [n]$ .  
101 Determine  $A \subseteq [n]$  such that  $|A| \leq k$  and for all  $B$  such that  $|B| \leq k$ ,  $f(B) \leq f(A)$ . An instance of  
102 MCC is the pair  $(f, k)$ ; however, rather than an explicit description of  $f$ , the function  $f$  is considered  
103 to be a value oracle;  $f$  may be queried on any set  $A \subseteq [n]$  to yield  $f(A)$ . The efficiency or runtime of  
104 an algorithm is measured by the number of queries made to the oracle  $f$ .

105 Finally, without loss of generality, instances of MCC considered in the following satisfy  $n \geq 4k$ . If  
106 this condition does not hold, the function may be extended to  $[m]$  by adding dummy elements to the  
107 domain which do not change the function value. That is, the function  $g : 2^m \rightarrow \mathbb{R}^+$  is defined as  
108  $g(A) = f(A \cap [n])$ ; it may be easily checked that  $g$  remains submodular, and any possible solution  
109 to the MCC instance  $(g, k)$  maps<sup>2</sup> to a solution of  $(f, k)$  of the same value. Hence, the ratio of any  
110 solution to  $(g, k)$  to the optimal is the same as the ratio of the mapped solution to the optimal on  
111  $(f, k)$ .

## 112 2 Approximation Algorithms

113 In this section, we present the approximation algorithms based upon interlacing greedy procedures.  
114 In Section 2.1, the technique is demonstrated with standard greedy procedures in algorithm Interlace-  
115 Greedy. In Section 2.2, the nearly linear-time algorithm FastInterlaceGreedy is introduced.

### 116 2.1 The InterlaceGreedy Algorithm

117 In this section, the InterlaceGreedy algorithm (InterlaceGreedy, Alg. 1) is introduced. InterlaceGreedy  
118 takes as input an instance of MCC and outputs a set  $C$ , which approximates  $\max_{|X| \leq k} f(X)$ .

119 InterlaceGreedy operates by interlacing two standard greedy procedures. This interlacing is  
120 accomplished by maintaining two disjoint sets  $A$  and  $B$ , which are initially empty. For  $k$  iterations,  
121 the element  $a \notin B$  with the highest marginal gain with respect to  $A$  is added to  $A$ , followed by an  
122 analogous greedy selection for  $B$ ; that is, the element  $b \notin A$  with the highest marginal gain with  
123 respect to  $B$  is added to  $B$ . After the first set of interlaced greedy procedures complete, a modified

<sup>2</sup>The mapping is to discard all elements greater than  $n$ .

---

**Algorithm 1** InterlaceGreedy  $(f, k)$ : The InterlaceGreedy Algorithm

---

```

1: Input:  $f : 2^{[n]} \rightarrow \mathbb{R}^+, k \in [n]$ 
2: Output:  $C \subseteq 2^{[n]}$ , such that  $|C| \leq k$ .
3:  $A_0 \leftarrow B_0 \leftarrow \emptyset$ 
4: for  $i \leftarrow 0$  to  $k - 1$  do
5:    $a_i \leftarrow \arg \max_{x \in 2^{[n]} \setminus (A_i \cup B_i)} f_x(A_i)$ 
6:    $A_{i+1} \leftarrow A_i + a_i$ 
7:    $b_i \leftarrow \arg \max_{x \in 2^{[n]} \setminus (A_{i+1} \cup B_i)} f_x(B_i)$ 
8:    $B_{i+1} \leftarrow B_i + b_i$ 
9:  $D_1 \leftarrow E_1 \leftarrow \{a_0\}$ 
10: for  $i \leftarrow 1$  to  $k - 1$  do
11:    $d_i \leftarrow \arg \max_{x \in 2^{[n]} \setminus (D_i \cup E_i)} f_x(D_i)$ 
12:    $D_{i+1} \leftarrow D_i + d_i$ 
13:    $e_i \leftarrow \arg \max_{x \in 2^{[n]} \setminus (D_{i+1} \cup E_i)} f_x(E_i)$ 
14:    $E_{i+1} \leftarrow E_i + e_i$ 
15: return  $C \leftarrow \arg \max \{f(A_i), f(B_i), f(D_i), f(E_i) : i \in [k + 1]\}$ 

```

---

version is repeated sets  $D, E$ , which are initialized to the maximum-value singleton  $\{a_0\}$ . Finally, the algorithm returns the set with the maximum  $f$ -value of any query the algorithm has made to  $f$ .

If  $f$  is submodular, InterlaceGreedy has an approximation ratio of  $1/4$  and query complexity  $O(kn)$ ; the deterministic algorithm of Gupta et al. (2010) has the same time complexity to achieve ratio  $1/6$ . The full proof of Theorem 1 is provided in Appendix A.

**Theorem 1.** Let  $f : 2^{[n]} \rightarrow \mathbb{R}^+$  be submodular; let  $k \in [n]$ , let  $O = \arg \max_{|S| \leq k} f(S)$ , and let  $C = \text{InterlaceGreedy}(f, k)$ . Then

$$f(C) \geq f(O)/4,$$

and InterlaceGreedy makes  $O(kn)$  queries to  $f$ .

*Proof sketch.* The main idea of the proof is to exploit the fact that if  $S$  and  $T$  are disjoint,

$$f(O \cup S) + f(O \cup T) \geq f(O) + f(O \cup S \cup T), \quad (1)$$

which is a consequence of the submodularity of  $f$ . Thus, if  $f(S) \geq \alpha f(O \cup S)$  and  $f(T) \geq \beta f(O \cup T)$ ,  $\max_{X \in \{S, T\}} f(X) \geq (\alpha + \beta)f(O)/4$ . Hence the proof proceeds by bounding  $f(A) \geq f(O \cup A)/2$  and  $f(B) \geq f((O \setminus \{a_0\}) \cup B)/2$ . This is accomplished by an adaptation of the proof that the greedy algorithm is a  $(1/2)$ -approximation for monotone submodular maximization with respect to a matroid constraint (Fisher et al., 1978): the adaptation requires a re-ordering that is not possible subject to a general matroid constraint but is possible with the cardinality constraint considered here. Because of the way the re-ordering works, it is only possible to show that  $f(B) \geq f((O \setminus \{a_0\}) \cup B)/2$ , instead of the desired  $f(B) \geq f(O \cup B)/2$ . Hence, a second greedy interlacing is required, starting both sets from  $\{a_0\}$ , to produce  $D, E$  such that  $f(D) \geq f(O \cup D)/2$  and  $f(E) \geq f(O \cup E)/2$ , with  $f(O \cup D) + f(O \cup E) \geq f(O \cup \{a_0\})$  by submodularity. Finally, the argument concludes by noticing that either  $a_0 \in O$  or  $a_0 \notin O$ .  $\square$

## 2.2 The FastInterlaceGreedy Algorithm

In this section, we provide a faster interlaced greedy algorithm (FastInterlaceGreedy (FIG), Alg. 2), which requires  $O(n \log n)$  queries. As input, an instance  $(f, k)$  of MCC is taken, as well as a parameter  $\delta > 0$ .

The algorithm FIG works as follows. As in InterlaceGreedy, there is a repeated interlacing of two greedy procedures. However, to ensure a faster query complexity, these greedy procedures are thresholded: a separate threshold  $\tau$  is maintained for each of the greedy procedures. The interlacing is accomplished by alternating calls to the ADD subroutine (Alg. 3), which adds a single element and is described below. When all of the thresholds fall below the value  $\delta M/n$ , the maximum of the greedy solutions is returned; here,  $\delta > 0$  is the input parameter,  $M$  is the maximum value of a singleton, and  $n$  is the size of the ground set.

---

**Algorithm 2** FIG  $(f, k, \delta)$ : The FastInterlaceGreedy Algorithm

---

```

1: Input:  $f : 2^{[n]} \rightarrow \mathbb{R}^+, k \in [n]$ 
2: Output:  $C \subseteq 2^{[n]}$ , such that  $|C| \leq k$ .
3:  $A_0 \leftarrow B_0 \leftarrow \emptyset$ 
4:  $M \leftarrow \tau_A \leftarrow \tau_B \leftarrow \max_{x \in [n]} f(x)$ 
5:  $i \leftarrow -1, a_{-1} \leftarrow 0, b_{-1} \leftarrow 0$ 
6: while  $\tau_A \geq \varepsilon M/n$  or  $\tau_B \geq \varepsilon M/n$  do
7:    $(a_{i+1}, \tau_A) \leftarrow \text{ADD}(A, B, a_i, \tau_A)$ 
8:    $(b_{i+1}, \tau_B) \leftarrow \text{ADD}(B, A, b_i, \tau_B)$ 
9:    $i \leftarrow i + 1$ 
10:  $D_1 \leftarrow E_1 \leftarrow \{a_0\}, \tau_D \leftarrow \tau_E \leftarrow M$ 
11:  $i \leftarrow 0, d_0 \leftarrow 0, e_0 \leftarrow 0$ 
12: while  $\tau_D \geq \varepsilon M/n$  or  $\tau_E \geq \varepsilon M/n$  do
13:    $(d_{i+1}, \tau_D) \leftarrow \text{ADD}(D, E, d_i, \tau_D)$ 
14:    $(e_{i+1}, \tau_E) \leftarrow \text{ADD}(E, D, e_i, \tau_E)$ 
15:    $i \leftarrow i + 1$ 
16: return  $C \leftarrow \arg \max\{f(A), f(B), f(D), f(E)\}$ 

```

---



---

**Algorithm 3** ADD  $(S, T, j, \tau)$ : The ADD subroutine

---

```

1: Input: Two sets  $S, T \subseteq [n]$ , element  $j \in [n], \tau \in \mathbb{R}^+$ 
2: Output:  $(i, \tau)$ , such that  $i \in [n], \tau \in \mathbb{R}^+$ 
3: if  $|S| = k$  then
4:   return  $(0, (1 - \delta)\tau)$ 
5: while  $\tau \geq \varepsilon M/n$  do
6:   for  $(x \leftarrow j; x < n; x \leftarrow x + 1)$  do
7:     if  $x \notin T$  then
8:       if  $f_x(S) \geq \tau$  then
9:          $S \leftarrow S \cup \{x\}$ 
10:      return  $(x, \tau)$ 
11:    $\tau \leftarrow (1 - \delta)\tau$ 
12:    $j \leftarrow 0$ 
13: return  $(0, \tau)$ 

```

---

155 The ADD subroutine is responsible for adding a single element above the input threshold and decreasing  
156 the threshold. It takes as input four parameters: two sets  $S, T$ , element  $j$ , and threshold  $\tau$ ; furthermore,  
157 ADD is given access to the oracle  $f$ , the budget  $k$ , and the parameter  $\delta$  of FIG. As an overview, ADD  
158 adds the first<sup>3</sup> on the element  $x > j$ , such that  $x \notin T$  and such that the marginal gain  $f_x(S)$  is at least  
159  $\tau$ . If no such element  $x > j$  exists, the threshold is decreased by a factor of  $(1 - \delta)$  and the process is  
160 repeated (with  $j$  set to 0). When such an element  $x$  is found, the element  $x$  is added to  $S$ , and the new  
161 threshold value and position  $x$  are returned. Finally, ADD ensures that the size of  $S$  does not exceed  $k$ .

162 Next, we prove the approximation ratio of FIG.

163 **Theorem 2.** Let  $f : 2^{[n]} \rightarrow \mathbb{R}^+$  be submodular, let  $k \in [n]$ , and let  $\varepsilon > 0$ . Let  $O =$   
164  $\arg \max_{|S| \leq k} f(S)$ . Choose  $\delta$  such that  $(1 - 6\delta)/4 > 1/4 - \varepsilon$ , and let  $C = \text{FIG}(f, k, \delta)$ . Then

$$f(C) \geq (1 - 6\delta)f(O)/4 \geq (1/4 - \varepsilon)f(O).$$

165 *Proof.* Let  $A, B, C, D, E, M$  have their values at termination of FIG( $f, k, \delta$ ). Let  $A =$   
166  $\{a_0, \dots, a_{|A|-1}\}$  be ordered by addition of elements by FIG into  $A$ . The proof requires the fol-  
167 lowing four inequalities:

$$f(O \cup A) \leq (2 + 2\delta)f(A) + \delta M, \quad (2)$$

$$f((O \setminus \{a_0\}) \cup B) \leq (2 + 2\delta)f(B) + \delta M, \quad (3)$$

$$f(O \cup D) \leq (2 + 2\delta)f(D) + \delta M, \quad (4)$$

$$f(O \cup E) \leq (2 + 2\delta)f(E) + \delta M. \quad (5)$$

---

<sup>3</sup>The first element  $x > j$  in the natural ordering on  $[n] = \{0, \dots, n - 1\}$ .

168 Once these inequalities have been established, Inequalities 2, 3, submodularity of  $f$ , and  $A \cap B = \emptyset$   
 169 imply

$$f(O \setminus \{a_0\}) \leq 2(1 + \delta)(f(A) + f(B)) + 2\delta M. \quad (6)$$

170 Similarly, from Inequalities 4, 5, submodularity of  $f$ , and  $D \cap E = \{a_0\}$ , it holds that

$$f(O \cup \{a_0\}) \leq 2(1 + \delta)(f(D) + f(E)) + 2\delta M. \quad (7)$$

171 Hence, from the fact that either  $a_0 \in O$  or  $a_0 \notin O$  and the definition of  $C$ , it holds that

$$f(O) \leq 4(1 + \delta)f(C) + 2\delta M.$$

172 Since  $f(C) \leq f(O)$  and  $M \leq f(O)$ , the theorem is proved.

173 The proofs of Inequalities 2–5 are similar. The proof of Inequality 3 is given here, while the proofs of  
 174 the others are provided in Appendix B.

175 *Proof of Inequality 3.* Let  $A = \{a_0, \dots, a_{|A|-1}\}$  be ordered as specified by FIG. Likewise, let  
 176  $B = \{b_0, \dots, b_{|B|-1}\}$  be ordered as specified by FIG.

177 **Lemma 1.**  $O \setminus (B \cup \{a_0\}) = \{o_0, \dots, o_{l-1}\}$  can be ordered such that

$$f_{o_i}(B_i) \leq (1 + 2\delta)f_{b_i}(B_i), \quad (8)$$

178 for any  $i \in [|B|]$ .

179 *Proof.* For each  $i \in [|B|]$ , define  $\tau_{B_i}$  to be the value of  $\tau$  when  $b_i$  was added to  $B$  in the ADD  
 180 subroutine. Order  $o \in (O \setminus (B \cup \{a_0\})) \cap A = \{o_0, \dots, o_{\ell-1}\}$  by the order in which these elements  
 181 were added into  $A$ . Order the remaining elements of  $O \setminus (B \cup \{a_0\})$  arbitrarily. Then, when  $b_i$  was  
 182 chosen by ADD, it holds that  $o_i \notin A_{i+1}$ , since  $A_1 = \{a_0\}$  and  $a_0 \notin O \setminus (B \cup \{a_0\})$ . Also, it is true  
 183  $o_i \notin B_i$ ; hence  $o_i$  was not added into some (possibly non-proper) subset  $B'_i$  of  $B_i$  at the previous  
 184 threshold value  $\frac{\tau_{B_i}}{(1-\delta)}$ . Hence  $f_{o_i}(B_i) \leq f_{o_i}(B'_i) < \frac{\tau_{B_i}}{(1-\delta)}$ , since  $o_i \notin A_{i+1}$ . Since  $f_{b_i}(B_i) \geq \tau_{B_i}$   
 185 and  $\delta < 1/2$ , inequality (8) follows.

186 Order  $\hat{O} = O \setminus (B \cup \{a_0\}) = \{o_0, \dots, o_{l-1}\}$  as indicated in the proof of Lemma 1, and let  
 187  $\hat{O}_i = \{o_0, \dots, o_{i-1}\}$ , if  $i \geq 1$ ,  $\hat{O}_0 = \emptyset$ . Then

$$\begin{aligned} f(\hat{O} \cup B) - f(B) &= \sum_{i=0}^{l-1} f_{o_i}(\hat{O}_i \cup B) \\ &= \sum_{i=0}^{|B|-1} f_{o_i}(\hat{O}_i \cup B) + \sum_{i=|B|}^{l-1} f_{o_i}(\hat{O}_i \cup B) \\ &\leq \sum_{i=0}^{|B|-1} f_{o_i}(B_i) + \sum_{i=|B|}^{l-1} f_{o_i}(B) \\ &\leq \sum_{i=0}^{|B|-1} (1 + 2\delta)f_{b_i}(B_i) + \sum_{i=|B|}^{l-1} f_{o_i}(B) \\ &\leq (1 + 2\delta)f(B) + \delta M, \end{aligned}$$

188 where any empty sum is defined to be 0; the first inequality follows by submodularity, the sec-  
 189 ond follows from Lemma 1, and the third follows from the definition of  $B$ , and the facts that  
 190  $\max_{x \in [n] \setminus A_{|B|+1}} f_x(B) < \varepsilon M/n$ ,  $l - |B| \leq k$ , and  $o_i \notin A_{|B|+1}$ , for  $|B| \leq i < l$ .

191 **Theorem 3.** Let  $f : 2^{[n]} \rightarrow \mathbb{R}^+$  be submodular, let  $k \in [n]$ , and let  $\delta > 0$ . Then the number of  
 192 queries to  $f$  by FIG( $f, k, \delta$ ) is at most  $O\left(\frac{n}{\delta} \log \frac{n}{\delta}\right)$ .



193 *Proof.* Recall  $[n] = \{0, 1, \dots, n-1\}$ . Let  $S \in \{A, B, D, E\}$ , and  $S = \{s_0, \dots, s_{|S|-1}\}$  in the  
 194 order in which elements were added to  $S$ . When ADD is called by FIG to add an element  $s_i \in [n]$  to  
 195  $S$ , if the value of  $\tau$  is the same as the value when  $s_{i-1}$  was added to  $S$ , then  $s_i > s_{i-1}$ . Finally, once  
 196 ADD queries the marginal gain of adding  $(n-1)$ , the threshold is revised downward by a factor of  
 197  $(1 - \delta)$ .

198 Therefore, there are at most  $O(n)$  queries of  $f$  at each distinct value of  $\tau_A, \tau_B, \tau_D, \tau_E$ . Since at most  
 199  $O(\frac{1}{\delta} \log \frac{n}{\delta})$  values are assumed by each of these thresholds, the theorem follows.  $\square$

## 200 3 Experimental Evaluation

201 In this section, performance of FastInterlaceGreedy (FIG) is compared with that of state-of-the-art  
 202 algorithms on two applications of submodular maximization: cardinality-constrained maximum cut  
 203 and network monitoring.

### 204 3.1 Setup

205 **Algorithms** We compare the following algorithms. Source code for the evaluated implementations  
 206 of all algorithms is available at <https://gofile.io/?c=ChYSOQ>.

- 207 • **FastInterlaceGreedy (Alg. 2):** FIG is implemented as specified in the pseudocode, with the  
 208 following addition: a stealing procedure is employed at the end, which uses submodularity  
 209 to quickly steal<sup>4</sup> elements from  $A, B, D, E$  into  $C$  in  $O(k)$  queries. This does not impact  
 210 the performance guarantee, as the value of  $C$  can only increase. The parameter  $\delta$  is set to  
 211 0.1, yielding approximation ratio of 0.1.
- 212 • **Gupta et al. (2010):** The algorithm of Gupta et al. (2010) for cardinality constraint; as the  
 213 subroutine for the unconstrained maximization subproblems, the deterministic, linear-time  
 214 1/3-approximation algorithm of Buchbinder et al. (2012) is employed. This yields an overall  
 215 approximation ratio of 1/7 for the implementation used herein. This algorithm is the fastest  
 216 deterministic approximation algorithm in prior literature.
- 217 • **FastRandomGreedy (FRG):** The  $O(\frac{n}{\varepsilon^2} \ln \frac{1}{\varepsilon})$  randomized algorithm of Buchbinder et al.  
 218 (2015) (Alg. 4 of that paper), with expected ratio  $1/e - \varepsilon$ ; the parameter  $\varepsilon$  was set to  
 219 0.3, yielding expected ratio of  $\approx 0.07$  as evaluated herein. This algorithm is the fastest  
 220 randomized approximation algorithm in prior literature.
- 221 • **BLITS:** The  $O(\log^2 n)$ -adaptive algorithm recently introduced in Balkanski et al. (2018);  
 222 the algorithm is employed as a heuristic without performance ratio, with the same parameter  
 223 choices as in Balkanski et al. (2018). In particular,  $\varepsilon = 0.3$  and 30 samples are used to  
 224 approximate the expectations. Also, a bound on OPT is guessed in logarithmically many  
 225 iterations as described in Balkanski et al. (2018) and references therein.

226 Results for randomized algorithms are the mean of 10 trials, and the standard deviation is represented  
 227 in plots by a shaded region.

228 **Applications** Many applications with non-monotone, submodular objective functions exist. In this  
 229 section, two applications are chosen to demonstrate the performance of the evaluated algorithms.

- 230 • **Cardinality-Constrained Maximum Cut:** The archetype of a submodular, non-monotone  
 231 function is the maximum cut objective: given graph  $G = (V, E)$ ,  $S \subseteq V$ ,  $f(S)$  is defined  
 232 to be the number of edges crossing from  $S$  to  $V \setminus S$ . In this evaluation, we consider the  
 233 cardinality constrained version of this problem.
- 234 • **Social Network Monitoring:** Given an online social network, suppose it is desired to choose  
 235  $k$  users to monitor, such that the maximum amount of content is propagated through these  
 236 users. Suppose the amount of content propagated between two users  $u, v$  is encoded as  
 237 weight  $w(u, v)$ . Then  $f(S) = \sum_{u \in S, v \notin S} w(u, v)$ .

---

<sup>4</sup>Details of the stealing procedure are given in Appendix C.

### 3.2 Results

In this section, results are presented for the algorithms on the two applications. In overview: in terms of objective value, FIG and Gupta et al. (2010) were about the same and outperformed BLITS and FRG. Meanwhile, FIG was the fastest algorithm by the metric of queries to the objective and was faster than Gupta et al. (2010) by at least an order of magnitude.

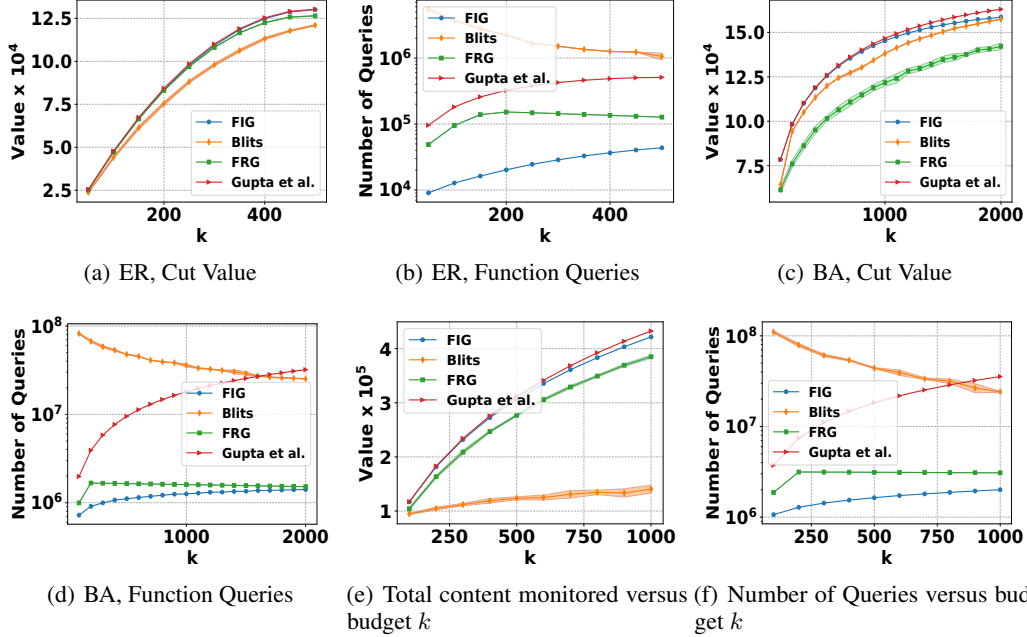

Figure 1: (a)–(d): Objective value and runtime for cardinality-constrained maxcut on random graphs. (e)–(f): Objective value and runtime for cardinality-constrained maxcut on ca-AstroPh with simulated amounts of content between users. In all plots, the  $x$ -axis shows the budget  $k$ .

**Cardinality Constrained MaxCut** For these experiments, two random graph models were employed: an Erdős-Rényi (ER) random graph with 1,000 nodes and edge probability  $p = 1/2$ , and a Barabási-Albert (BA) graph with  $n = 10,000$  and  $m = m_0 = 100$ .

On the ER graph, results are shown in Figs. 1(a) and 1(b); the results on the BA graph are shown in Figs. 1(c) and 1(d). In terms of cut value, the algorithm of Gupta et al. (2010) performed the best, although the value produced by FIG was nearly the same. On the ER graph, the next best was FRG followed by BLITS; whereas on the BA graph, BLITS outperformed FRG in cut value. In terms of efficiency of queries, FIG used the smallest number on every evaluated instance, although the number did increase logarithmically with budget. The number of queries used by FRG was higher, but after a certain budget remained constant. The next most efficient was Gupta et al. (2010) followed by BLITS.

**Social Network Monitoring** For the social network monitoring application, the citation network ca-AstroPh from the SNAP dataset collection was used, with  $n = 18,772$  users and 198,110 edges. Edge weights, which represent the amount of content shared between users, were generated uniformly randomly in  $[1, 10]$ . The results were similar qualitatively to those for the unweighted MaxCut problem presented previously. FIG is the most efficient in terms of number of queries, and FIG is only outperformed in solution quality by Gupta et al. (2010), which required more than an order of magnitude more queries.



## References

- Ashwinkumar Badanidiyuru and J Vondrák. Fast algorithms for maximizing submodular functions. *Proceedings of the 25th Annual ACM-SIAM Symposium on Discrete Algorithms (SODA)*, pages 1497–1514, 2014.
- Eric Balkanski, Adam Breuer, and Yaron Singer. Non-monotone submodular maximization in exponentially fewer iterations. In *NeurIPS*, 2018.
- Niv Buchbinder and Moran Feldman. Constrained Submodular Maximization via a Non-symmetric Technique. 2016.
- Niv Buchbinder and Moran Feldman. Deterministic Algorithms for Submodular Maximization. *ACM Transactions on Algorithms*, 14(3), 2018a.
- Niv Buchbinder and Moran Feldman. Submodular Functions Maximization Problems – A Survey. In Teofilo F. Gonzalez, editor, *Handbook of Approximation Algorithms and Metaheuristics*. Second edition, 2018b.
- Niv Buchbinder, Moran Feldman, Joseph Seffi Naor, and Roy Schwartz. A Tight Linear Time  $(1/2)$ -Approximation for Unconstrained Submodular Maximization. In *FOCS*, pages 649–658, 2012.
- Niv Buchbinder, Moran Feldman, Joseph Seffi Naor, and Roy Schwartz. Submodular Maximization with Cardinality Constraints. In *Symposium on Discrete Algorithms (SODA)*. ACM, 2014.
- Niv Buchbinder, Moran Feldman, and Roy Schwartz. Comparing Apples and Oranges: Query Tradeoff in Submodular Maximization. In *Symposium on Discrete Algorithms (SODA)*, pages 1149–1168. ACM-SIAM, 2015.
- Alina Ene and Huy L. Nguyen. Constrained Submodular Maximization : Beyond  $1/e$ . In *FOCS*, pages 248–257, 2016.
- Uriel Feige, Vahab S. Mirrokni, and Jan Vondrák. Maximizing Non-Monotone Submodular Functions. *SIAM Journal on Computing*, 40(4):1133–1153, 2011.
- Moran Feldman, Christopher Harshaw, and Amin Karbasi. Greed is Good: Near-Optimal Submodular Maximization via Greedy Optimization. In *COLT*, pages 1–26, 2017.
- M.L. Fisher, G.L. Nemhauser, and L.A. Wolsey. An analysis of approximations for maximizing submodular set functions-II. *Mathematical Programming*, 8:73–87, 1978.
- Jennifer Gillenwater, Alex Kulesza, and Ben Taskar. Near-Optimal MAP Inference for Determinantal Point Processes. In *NIPS*, 2012.
- Anupam Gupta, Aaron Roth, Grant Schoenebeck, and Kunal Talwar. Constrained non-monotone submodular maximization: Offline and secretary algorithms. In *WINE*, volume 6484 LNCS, pages 246–257, 2010.
- David Kempe, Jon Kleinberg, and Éva Tardos. Maximizing the spread of influence through a social network. In *Proceedings of the 9th ACM SIGKDD International Conference on Knowledge Discovery and Data Mining (KDD)*, pages 137–146, 2003.
- Jon Lee, Vahab Mirrokni, Viswanath Nagarajan, and Maxim Sviridenko. Maximizing Nonmonotone Submodular Functions under Matroid or Knapsack Constraints. *Siam Journal of Discrete Math*, 23(4):2053–2078, 2010.
- Jure Leskovec, Andreas Krause, Carlos Guestrin, Christos Faloutsos, Jeanne VanBriesen, and Natalie Glance. Cost-effective Outbreak Detection in Networks. In *Proceedings of the 13th ACM SIGKDD International Conference on Knowledge Discovery and Data Mining (KDD)*, pages 420–429, 2007.
- Baharan Mirzasoleiman, Ashwinkumar Badanidiyuru, Amin Karbasi, Jan Vondrak, and Andreas Krause. Lazier Than Lazy Greedy. In *Proceedings of the Twenty-Ninth AAAI Conference on Artificial Intelligence (AAAI)*, pages 1812–1818, 2015.

- 306 Baharan Mirzasoleiman, Ashwinkumar Badanidiyuru, and Amin Karbasi. Fast Constrained Submod-  
307 ular Maximization : Personalized Data Summarization. In *ICML*, 2016.
- 308 Baharan Mirzasoleiman, Stefanie Jegelka, and Andreas Krause. Streaming Non-Monotone Submod-  
309 ular Maximization: Personalized Video Summarization on the Fly. In *AAAI*, pages 1379–1386,  
310 2018.
- 311 Joseph Seffi Naor and Roy Schwartz. A Unified Continuous Greedy Algorithm for Submodular  
312 Maximization. pages 570–579, 2011.
- 313 G L Nemhauser and L A Wolsey. Best Algorithms for Approximating the Maximum of a Submodular  
314 Set Function. *Mathematics of Operations Research*, 3(3):177–188, 1978.
- 315 G. L. Nemhauser, L. A. Wolsey, and M. L. Fisher. An analysis of approximations for maximizing  
316 submodular set functions-I. *Mathematical Programming*, 14(1):265–294, 1978.

## 317 **A Proof of Theorem 1**

318 *Proof of Theorem 1.*

**Lemma 2.**

$$4f(C) \geq f(O \setminus \{a_0\}).$$

319 *Proof.* Let  $A = \arg \max_{i \in [k+1]} f(A_i)$ . Let  $\hat{O} = O \setminus A_k = \{o_0, \dots, o_{l-1}\}$  be ordered such that for  
 320 each  $i \in [l]$ ,  $o_i \notin B_i$ ; this ordering is possible since  $B_0 = \emptyset$  and  $l \leq k$ . Also, for each  $i \in [l]$ , let  
 321  $\hat{O}_i = \{o_0, \dots, o_i\}$ , and let  $\hat{O}_0 = \emptyset$ . Then

$$\begin{aligned} f(O \cup A_k) - f(A_k) &= \sum_{i=0}^{l-1} f_{o_i}(\hat{O}_i \cup A_k) \\ &\leq \sum_{i=0}^{l-1} f_{o_i}(A_i) \\ &\leq \sum_{i=0}^{l-1} f_{a_i}(A_i) = f(A_l), \end{aligned}$$

322 where the first inequality follows from submodularity, the second inequality follows from the greedy  
 323 choice  $a_i = \arg \max_{x \in 2^{[n] \setminus (A_i \cup B_i)}} f_x(A_i)$  and the fact that  $o_i \notin B_i$ . Hence

$$f(O \cup A_k) \leq f(A_l) + f(A_k) \leq 2f(A). \quad (9)$$

324 Let  $B = \arg \max_{i \in [k+1]} f(B_i)$ . Let  $\hat{O} = O \setminus (\{a_0\} \cup B_k) = \{o_0, \dots, o_{l-1}\}$  be ordered such that  
 325 for each  $i \in [l]$ ,  $o_i \notin A_{i+1}$ ; this ordering is possible since  $A_1 = \{a_0\}$ ,  $a_0 \notin \hat{O}$ , and  $l \leq k$ . Also, for  
 326 each  $i \in [l]$ , let  $\hat{O}_i = \{o_0, \dots, o_i\}$ , and let  $\hat{O}_0 = \emptyset$ . Then

$$\begin{aligned} f((O \setminus \{a_0\}) \cup B_k) - f(B_k) &= \sum_{i=0}^{l-1} f_{o_i}(\hat{O}_i \cup B_k) \\ &\leq \sum_{i=0}^{l-1} f_{o_i}(B_i) \\ &\leq \sum_{i=0}^{l-1} f_{b_i}(B_i) = f(B_l), \end{aligned}$$

327 where the first inequality follows from submodularity, the second inequality follows from the greedy  
 328 choice  $b_i = \arg \max_{x \in 2^{[n] \setminus (A_{i+1} \cup B_i)}} f_x(B_i)$  and the fact that  $o_i \notin A_{i+1}$ . Hence

$$f((O \setminus \{a_0\}) \cup B_k) \leq f(B_l) + f(B_k) \leq 2f(B). \quad (10)$$

329 By inequalities (9), (10), the fact that  $A_k \cap B_k = \emptyset$ , and submodularity, we have

$$f(O \setminus \{a_0\}) \leq f(O \cup A_k) + f((O \setminus \{a_0\}) \cup B_k) \leq 2(f(A) + f(B)) \leq 4f(C).$$

330 □

**Lemma 3.**

$$4f(C) \geq f(O \cup \{a_0\}).$$

331 *Proof.* Let  $D = \arg \max_{i \in [k+1]} f(A_i)$ . Let  $\hat{O} = O \setminus D_k = \{o_0, \dots, o_{l-1}\}$  be ordered such that for  
 332 each  $i \in [l]$ ,  $o_i \notin E_i$ ; this ordering is possible since  $E_0 = \emptyset$  and  $l \leq k$ . Also, for each  $i \in [l]$ , let

333  $\hat{O}_i = \{o_0, \dots, o_i\}$ , and let  $\hat{O}_0 = \emptyset$ . Then

$$\begin{aligned}
 f(O \cup D_k) - f(D_k) &= \sum_{i=0}^{l-1} f_{o_i}(\hat{O}_i \cup D_k) \\
 &\leq \sum_{i=0}^{l-1} f_{o_i}(D_i) \\
 &\leq \sum_{i=0}^{l-1} f_{d_i}(D_i) = f(D_l),
 \end{aligned}$$

334 where the first inequality follows from submodularity, the second inequality follows from the greedy  
 335 choice  $d_i = \arg \max_{x \in 2^{[n] \setminus (D_i \cup E_i)}} f_x(D_i)$  and the fact that  $o_i \notin E_i$ . Hence

$$f(O \cup D_k) \leq f(D_l) + f(D_k) \leq 2f(D). \quad (11)$$

336 Let  $E = \arg \max_{i \in [k+1]} f(E_i)$ . Let  $\hat{O} = O \setminus E_k = \{o_0, \dots, o_{l-1}\}$  be ordered such that for each  
 337  $i \in [l]$ ,  $o_i \notin D_{i+1}$ ; this ordering is possible since  $D_1 = \{a_0\}$ ,  $a_0 \notin \hat{O}$  (since  $a_0 \in E_k$ ), and  $l \leq k$ .  
 338 Also, for each  $i \in [l]$ , let  $\hat{O}_i = \{o_0, \dots, o_i\}$ , and let  $\hat{O}_0 = \emptyset$ . Then

$$\begin{aligned}
 f(O \cup E_k) - f(E_k) &= \sum_{i=0}^{l-1} f_{o_i}(\hat{O}_i \cup E_k) \\
 &\leq \sum_{i=0}^{l-1} f_{o_i}(E_i) \\
 &\leq \sum_{i=0}^{l-1} f_{e_i}(E_i) = f(E_l),
 \end{aligned}$$

339 where the first inequality follows from submodularity, the second inequality follows from the greedy  
 340 choices  $e_0 = \arg \max_{x \in [n]} f(x)$ , and if  $i > 0$ ,  $e_i = \arg \max_{x \in 2^{[n] \setminus (D_{i+1} \cup E_i)}} f_x(E_i)$  and the fact  
 341 that  $o_i \notin D_{i+1}$ . Hence

$$f((O \cup E_k) \leq f(E_l) + f(E_k) \leq 2f(E). \quad (12)$$

342 By inequalities (11), (12), the fact that  $D_k \cap E_k = \{a_0\}$ , and submodularity, we have

$$f(O \cup \{a_0\}) \leq f(O \cup D_k) + f((O \cup E_k) \leq 2(f(D) + f(E)) \leq 4f(C).$$

343 □

344 The proof of the theorem follows from Lemmas 2, 3, and the fact that one of the statements  $a_0 \in O$   
 345 or  $a_0 \notin O$  must hold; hence, either  $O \cup \{a_0\} = O$  or  $O \setminus \{a_0\} = O$ . □

## 346 B Proofs for Theorem 2

347 *Proof of Inequality 2.* Let  $A = \{a_0, \dots, a_{|A|-1}\}$  be ordered as specified by FIG. Likewise, let  
 348  $B = \{b_0, \dots, b_{|B|-1}\}$  be ordered as specified by FIG.

349 **Lemma 4.**  $O \setminus A = \{o_0, \dots, o_{l-1}\}$  can be ordered such that

$$f_{o_i}(A_i) \leq (1 + 2\delta)f_{a_i}(A_i), \quad (13)$$

350 if  $i \in [|A|]$ .

351 *Proof.* Order  $o \in (O \setminus A) \cap B = \{o_0, \dots, o_{l-1}\}$  by the order in which these elements were added  
 352 into  $B$ . Order the remaining elements of  $O \setminus A$  arbitrarily. Then, when  $a_i$  was chosen by ADD, it  
 353 holds that  $o_i \notin B_i$ . Also, it is true  $o_i \notin A_i$ ; hence  $o_i$  was not added into some (possibly non-proper)  
 354 subset  $A'_i$  of  $A_i$  at the previous threshold value  $\frac{\tau_{A_i}}{(1-\delta)}$ . Hence  $f_{o_i}(A_i) \leq f_{o_i}(A'_i) < \frac{\tau_{A_i}}{(1-\delta)}$ , since  
 355  $o_i \notin B_i$ . Since  $f_{a_i}(A_i) \geq \tau_{A_i}$  and  $\delta < 1/2$ , inequality (13) follows. □

Order  $\hat{O} = O \setminus A = \{o_0, \dots, o_{l-1}\}$  as indicated in the proof of Lemma 4, and let  $\hat{O}_i = \{o_0, \dots, o_{i-1}\}$ , if  $i \geq 1$ ,  $\hat{O}_0 = \emptyset$ . Then

$$\begin{aligned}
f(O \cup A) - f(A) &= \sum_{i=0}^{l-1} f_{o_i}(\hat{O}_i \cup A) \\
&= \sum_{i=0}^{|A|-1} f_{o_i}(\hat{O}_i \cup A) + \sum_{i=|A|}^{l-1} f_{o_i}(\hat{O}_i \cup A) \\
&\leq \sum_{i=0}^{|A|-1} f_{o_i}(A_i) + \sum_{i=|A|}^{l-1} f_{o_i}(A) \\
&\leq \sum_{i=0}^{|A|-1} (1 + 2\delta) f_{a_i}(A_i) + \sum_{i=|A|}^{l-1} f_{o_i}(A) \\
&\leq (1 + 2\delta) f(A) + \delta M,
\end{aligned}$$

where any empty sum is defined to be 0; the first inequality follows by submodularity, the second follows from Lemma 4, and the third follows from the definition of  $A$ , and the facts that  $\max_{x \in [n] \setminus B_{|A|}} f_x(A) < \varepsilon M/n$  and  $l - |A| \leq k$ .  $\square$

*Proof of Inequality 4.* As in the proof of Inequality 2, it suffices to establish the following lemma.  $\square$

**Lemma 5.**  $O \setminus D = \{o_0, \dots, o_{l-1}\}$  can be ordered such that

$$f_{o_i}(D_i) \leq (1 + 2\delta) f_{d_i}(D_i), \quad (14)$$

for  $i \in [|D|]$ .

*Proof.* Order  $o \in (O \setminus D) \cap E = \{o_0, \dots, o_{\ell-1}\}$  by the order in which these elements were added into  $E$ . Order the remaining elements of  $O \setminus D$  arbitrarily. Then, when  $d_i$  was chosen by ADD, it holds that  $o_i \notin E_i$ . Also, it is true  $o_i \notin D_i$ ; hence  $o_i$  was not added into some (possibly non-proper) subset  $D'_i$  of  $D_i$  at the previous threshold value  $\frac{\tau_{D_i}}{(1-\delta)}$ . Hence  $f_{o_i}(D_i) \leq f_{o_i}(D'_i) < \frac{\tau_{D_i}}{(1-\delta)}$ , since  $o_i \notin E_i$ . Since  $f_{d_i}(D_i) \geq \tau_{D_i}$  and  $\delta < 1/2$ , inequality (14) follows.  $\square$

*Proof of Inequality 5.* As in the proof of Inequality 2, it suffices to establish the following lemma.

**Lemma 6.**  $O \setminus E = \{o_0, \dots, o_{l-1}\}$  can be ordered such that

$$f_{o_i}(E_i) \leq (1 + 2\delta) f_{e_i}(E_i), \quad (15)$$

for  $i \in [|E|]$ .

*Proof.* Order  $o \in (O \setminus E) \cap D = \{o_0, \dots, o_{\ell-1}\}$  by the order in which these elements were added into  $D$ . Order the remaining elements of  $O \setminus E$  arbitrarily. Then, when  $e_i$  was chosen by ADD, it holds that  $o_i \notin D_{i+1}$ , since  $D_1 = \{a_0\}$  and  $a_0 = d_0 \notin O \setminus E$ . Also, it is true  $o_i \notin E_i$ ; hence  $o_i$  was not added into some (possibly non-proper) subset  $E'_i$  of  $E_i$  at the previous threshold value  $\frac{\tau_{E_i}}{(1-\delta)}$ . Hence  $f_{o_i}(E_i) \leq f_{o_i}(E'_i) < \frac{\tau_{E_i}}{(1-\delta)}$ , since  $o_i \notin D_{i+1}$ . Since  $f_{e_i}(E_i) \geq \tau_{E_i}$  and  $\delta < 1/2$ , inequality (15) follows.  $\square$

378  $\square$

## 379 C Stealing Procedure for FastInterlaceGreedy

In this section, we describe an  $O(k)$  procedure that may improve the quality of the solution found by FastInterlaceGreedy (a similar procedure could also be employed for InterlaceGreedy).

Let  $A, B, C, D, E$  have their values at the termination of FastInterlaceGreedy. Then calculate the sets  $G = \{B_c = f(C) - f(C \setminus \{c\}) : c \in C\}$  and  $H = \{A_x = f(C \cup \{x\}) - f(C) : x \in A \cup B \cup D \cup E\}$ .

384 Then sort  $G = (B_{c_1}, \dots, B_{c_k})$  in non-decreasing order and sort  $H = (A_{x_1}, \dots, A_{x_l})$  in non-  
 385 increasing order. Computing and sorting these sets requires  $O(k \log k)$  time (and only  $O(k)$  queries  
 386 to  $f$ ).  
 387 Finally, iterate through the elements of  $G$  in the sorted order, and if  $B_{c_i} < A_{x_i}$  then  $C$  is assigned  
 388  $C \setminus \{c_i\} \cup \{x_i\}$  if this assignment increases the value  $f(C)$ .
